# Supplementary material
Source: HighWire-hosted journal article supplement (https://jnnp.bmj.com/content/jnnp-2019-322366)
Supplement: inline-supplementary-material-1 [file inline-supplementary-material-1.pdf]

**Supplementary Table S1.** Hazard ratios and 95% confidence intervals of all-cause dementia and its subtypes according to serum total homocysteine levels after excluding participants who developed dementia within the first two years of follow-up

| Serum total homocysteine levels ( $\mu\text{mol/L}$ ) | No. of events/<br>subjects | Hazard ratio (95% confidence interval) |        |                         |        |
|-------------------------------------------------------|----------------------------|----------------------------------------|--------|-------------------------|--------|
|                                                       |                            | Age- and sex-adjusted                  | P      | Multivariable-adjusted* | P      |
| <b>All-cause dementia</b>                             |                            |                                        |        |                         |        |
| Quintile 1 ( $\leq 6.4$ )                             | 51/326                     | 1.00 (reference)                       |        | 1.00 (reference)        |        |
| Quintile 2 (6.5–7.6)                                  | 53/296                     | 1.14 (0.77–1.67)                       | 0.52   | 1.19 (0.80–1.77)        | 0.38   |
| Quintile 3 (7.7–9.0)                                  | 64/328                     | 1.18 (0.81–1.72)                       | 0.39   | 1.28 (0.87–1.90)        | 0.21   |
| Quintile 4 (9.1–11.4)                                 | 68/300                     | 1.27 (0.87–1.86)                       | 0.22   | 1.36 (0.90–2.05)        | 0.15   |
| Quintile 5 ( $\geq 11.5$ )                            | 92/294                     | 2.13 (1.46–3.12)                       | <0.001 | 2.31 (1.49–3.56)        | <0.001 |
| P for trend†                                          |                            | <0.001                                 |        | <0.001                  |        |
| <b>Alzheimer's disease</b>                            |                            |                                        |        |                         |        |
| Quintile 1 ( $\leq 6.4$ )                             | 37/326                     | 1.00 (reference)                       |        | 1.00 (reference)        |        |
| Quintile 2 (6.5–7.6)                                  | 38/296                     | 1.15 (0.73–1.81)                       | 0.55   | 1.21 (0.76–1.93)        | 0.42   |
| Quintile 3 (7.7–9.0)                                  | 43/328                     | 1.15 (0.73–1.80)                       | 0.55   | 1.14 (0.72–1.83)        | 0.58   |
| Quintile 4 (9.1–11.4)                                 | 45/300                     | 1.19 (0.76–1.88)                       | 0.44   | 1.23 (0.75–2.03)        | 0.41   |
| Quintile 5 ( $\geq 11.5$ )                            | 59/294                     | 1.98 (1.26–3.13)                       | 0.003  | 2.04 (1.20–3.48)        | 0.009  |
| P for trend†                                          |                            | 0.001                                  |        | 0.004                   |        |
| <b>Vascular dementia</b>                              |                            |                                        |        |                         |        |
| Quintile 1 ( $\leq 6.4$ )                             | 14/326                     | 1.00 (reference)                       |        | 1.00 (reference)        |        |
| Quintile 2 (6.5–7.6)                                  | 9/296                      | 0.68 (0.29–1.59)                       | 0.38   | 0.71 (0.30–1.70)        | 0.45   |
| Quintile 3 (7.7–9.0)                                  | 17/328                     | 1.08 (0.52–2.24)                       | 0.84   | 1.47 (0.68–3.21)        | 0.33   |
| Quintile 4 (9.1–11.4)                                 | 17/300                     | 1.14 (0.54–2.41)                       | 0.73   | 1.34 (0.59–3.01)        | 0.48   |
| Quintile 5 ( $\geq 11.5$ )                            | 25/294                     | 2.07 (0.99–4.34)                       | 0.054  | 2.31 (0.98–5.45)        | 0.057  |
| P for trend†                                          |                            | 0.007                                  |        | 0.01                    |        |

\*Adjusted for age, sex, education, hypertension, diabetes, serum total cholesterol, body mass index, estimated glomerular filtration rate, history of stroke, current smoking, current drinking, regular exercise, serum albumin, serum folate, and serum vitamin B12 levels (log-transformed).

†Trend tests were conducted by treating the quintiles as a continuous variable and assigning the midpoint concentration for each quintile.

**Supplementary Table S2.** Hazard ratios and 95% confidence intervals of all-cause dementia and its subtypes according to serum total homocysteine levels after excluding participants who did not fast overnight prior to blood sample collection

| Serum total homocysteine levels ( $\mu\text{mol/L}$ ) | No. of events/<br>subjects | Hazard ratio (95% confidence interval) |        |                         |        |
|-------------------------------------------------------|----------------------------|----------------------------------------|--------|-------------------------|--------|
|                                                       |                            | Age- and sex-adjusted                  | P      | Multivariable-adjusted* | P      |
| <b>All-cause dementia</b>                             |                            |                                        |        |                         |        |
| Quintile 1 ( $\leq 6.4$ )                             | 53/327                     | 1.00 (reference)                       |        | 1.00 (reference)        |        |
| Quintile 2 (6.5–7.6)                                  | 53/293                     | 1.11 (0.76–1.63)                       | 0.58   | 1.19 (0.81–1.76)        | 0.37   |
| Quintile 3 (7.7–9.0)                                  | 67/330                     | 1.16 (0.80–1.67)                       | 0.44   | 1.29 (0.88–1.90)        | 0.19   |
| Quintile 4 (9.1–11.4)                                 | 76/305                     | 1.31 (0.91–1.89)                       | 0.15   | 1.42 (0.96–2.11)        | 0.08   |
| Quintile 5 ( $\geq 11.5$ )                            | 105/298                    | 2.18 (1.51–3.16)                       | <0.001 | 2.45 (1.61–3.75)        | <0.001 |
| P for trend†                                          |                            | <0.001                                 |        | <0.001                  |        |
| <b>Alzheimer's disease</b>                            |                            |                                        |        |                         |        |
| Quintile 1 ( $\leq 6.4$ )                             | 39/327                     | 1.00 (reference)                       |        | 1.00 (reference)        |        |
| Quintile 2 (6.5–7.6)                                  | 37/293                     | 1.08 (0.69–1.70)                       | 0.73   | 1.14 (0.72–1.81)        | 0.57   |
| Quintile 3 (7.7–9.0)                                  | 45/330                     | 1.10 (0.71–1.70)                       | 0.67   | 1.14 (0.72–1.80)        | 0.58   |
| Quintile 4 (9.1–11.4)                                 | 49/305                     | 1.19 (0.76–1.84)                       | 0.45   | 1.27 (0.79–2.06)        | 0.33   |
| Quintile 5 ( $\geq 11.5$ )                            | 64/298                     | 1.93 (1.24–3.02)                       | 0.004  | 2.11 (1.25–3.56)        | 0.005  |
| P for trend†                                          |                            | 0.001                                  |        | 0.001                   |        |
| <b>Vascular dementia</b>                              |                            |                                        |        |                         |        |
| Quintile 1 ( $\leq 6.4$ )                             | 14/327                     | 1.00 (reference)                       |        | 1.00 (reference)        |        |
| Quintile 2 (6.5–7.6)                                  | 9/293                      | 0.70 (0.30–1.63)                       | 0.41   | 0.78 (0.33–1.86)        | 0.58   |
| Quintile 3 (7.7–9.0)                                  | 17/330                     | 1.08 (0.52–2.23)                       | 0.84   | 1.50 (0.70–3.23)        | 0.30   |
| Quintile 4 (9.1–11.4)                                 | 19/305                     | 1.23 (0.59–2.53)                       | 0.58   | 1.36 (0.62–2.98)        | 0.44   |
| Quintile 5 ( $\geq 11.5$ )                            | 35/298                     | 2.64 (1.31–5.34)                       | 0.007  | 2.86 (1.27–6.45)        | 0.01   |
| P for trend†                                          |                            | <0.001                                 |        | 0.001                   |        |

\*Adjusted for age, sex, education, hypertension, diabetes, serum total cholesterol, body mass index, estimated glomerular filtration rate, history of stroke, current smoking, current drinking, regular exercise, serum albumin, serum folate, and serum vitamin B12 levels (log-transformed).

†Trend tests were conducted by treating the quintiles as a continuous variable and assigning the midpoint concentration for each quintile.

**Supplementary Table S3.** Hazard ratios and 95% confidence intervals of all-cause dementia according to serum total homocysteine levels in subgroups

| Subgroups                      | No. of events | No. of subjects | HR (95% CI)*     | P      | P for heterogeneity |
|--------------------------------|---------------|-----------------|------------------|--------|---------------------|
| Overall                        | 372           | 1588            | 1.79 (1.38–2.33) | <0.001 |                     |
| Age                            |               |                 |                  |        |                     |
| <75 years                      | 152           | 1095            | 2.33 (1.45–3.71) | <0.001 | 0.34                |
| ≥75 years                      | 220           | 493             | 1.78 (1.29–2.47) | <0.001 |                     |
| Sex                            |               |                 |                  |        |                     |
| Female                         | 237           | 912             | 1.84 (1.29–2.63) | <0.001 | 0.73                |
| Male                           | 135           | 676             | 1.58 (1.05–2.40) | 0.03   |                     |
| Education                      |               |                 |                  |        |                     |
| >9 years                       | 125           | 750             | 2.11 (1.34–3.33) | 0.001  | 0.03                |
| ≤9 years                       | 247           | 838             | 1.58 (1.13–2.20) | 0.007  |                     |
| Hypertension                   |               |                 |                  |        |                     |
| No                             | 125           | 648             | 1.53 (0.91–2.56) | 0.11   | 0.72                |
| Yes                            | 247           | 940             | 1.85 (1.36–2.53) | <0.001 |                     |
| Diabetes                       |               |                 |                  |        |                     |
| No                             | 292           | 1239            | 2.00 (1.49–2.69) | <0.001 | 0.33                |
| Yes                            | 80            | 349             | 1.22 (0.66–2.26) | 0.53   |                     |
| Serum total cholesterol        |               |                 |                  |        |                     |
| <5.69 mmol/L                   | 275           | 1119            | 1.68 (1.24–2.27) | <0.001 | 0.38                |
| ≥5.69 mmol/L                   | 97            | 469             | 2.53 (1.45–4.41) | 0.001  |                     |
| Body mass index                |               |                 |                  |        |                     |
| <25 kg/m <sup>2</sup>          | 293           | 1163            | 1.82 (1.36–2.44) | <0.001 | 0.15                |
| ≥25 kg/m <sup>2</sup>          | 79            | 425             | 1.48 (0.74–2.93) | 0.27   |                     |
| eGFR                           |               |                 |                  |        |                     |
| ≥60 mL/min/1.73 m <sup>2</sup> | 284           | 1361            | 1.67 (1.20–2.31) | 0.002  | 0.59                |
| <60 mL/min/1.73 m <sup>2</sup> | 88            | 227             | 1.61 (1.00–2.61) | 0.05   |                     |
| History of stroke              |               |                 |                  |        |                     |
| No                             | 340           | 1507            | 1.82 (1.34–2.47) | <0.001 | 0.65                |
| Yes                            | 32            | 81              | 0.88 (0.33–2.34) | 0.79   |                     |
| Current smoking                |               |                 |                  |        |                     |
| No                             | 320           | 1356            | 1.84 (1.38–2.45) | <0.001 | 0.73                |
| Yes                            | 52            | 232             | 1.08 (0.52–2.25) | 0.83   |                     |
| Current drinking               |               |                 |                  |        |                     |
| No                             | 264           | 1021            | 1.64 (1.19–2.26) | 0.002  | 0.63                |
| Yes                            | 108           | 567             | 2.02 (1.22–3.34) | 0.006  |                     |
| Regular exercise               |               |                 |                  |        |                     |
| <3 times/week                  | 329           | 1385            | 1.77 (1.34–2.35) | <0.001 | 0.69                |
| ≥3 times/week                  | 43            | 203             | 2.03 (0.85–4.83) | 0.11   |                     |
| Serum albumin                  |               |                 |                  |        |                     |

|                   |     |     |                  |        |      |
|-------------------|-----|-----|------------------|--------|------|
| ≤4.3 g/dL†        | 235 | 909 | 1.89 (1.34–2.65) | <0.001 | 0.75 |
| >4.3 g/dL†        | 137 | 679 | 1.69 (1.07–2.67) | 0.02   |      |
| Serum folate      |     |     |                  |        |      |
| ≤4.8 ng/mL†       | 186 | 783 | 1.42 (1.00–2.04) | 0.05   | 0.10 |
| >4.8 ng/mL†       | 186 | 805 | 2.89 (1.91–4.37) | <0.001 |      |
| Serum vitamin B12 |     |     |                  |        |      |
| ≤458 pg/mL†       | 193 | 793 | 1.82 (1.30–2.54) | <0.001 | 0.94 |
| >458 pg/mL†       | 179 | 795 | 1.46 (0.93–2.29) | 0.10   |      |

Abbreviations: HR, Hazard ratios; CI, confidence interval; eGFR, estimated glomerular filtration rate

\*HRs (95% CIs) of all-cause dementia were estimated for participants in the highest quintile of serum total homocysteine ( $\geq 11.5$   $\mu\text{mol/L}$ ) versus those in the lower quintiles ( $< 11.5$   $\mu\text{mol/L}$ ). The risk estimates were adjusted for age, sex, education, hypertension, diabetes, serum total cholesterol, body mass index, estimated glomerular filtration rate, history of stroke, current smoking, current drinking, regular exercise, serum albumin, serum folate, and serum vitamin B12 levels (log-transformed). The subgroup variable was excluded from the corresponding model.

†Cut-off values are the median.

**Supplementary Table S4.** Baseline characteristics of participants by the MTHFR C677T genotype

|                                            | CC genotype<br>(n=614) | CT/TT genotype<br>(n=944) | P         |
|--------------------------------------------|------------------------|---------------------------|-----------|
| Age, years                                 | 71 (8)                 | 71 (8)                    | 0.17      |
| Male, %                                    | 45.4                   | 41.4                      | 0.12      |
| Education $\leq$ 9 years, %                | 54.4                   | 51.5                      | 0.26      |
| Systolic blood pressure, mmHg              | 138 (20)               | 137 (21)                  | 0.45      |
| Diastolic blood pressure, mmHg             | 79 (11)                | 79 (11)                   | 0.64      |
| Use of antihypertensive agents, %          | 36.6                   | 35.9                      | 0.77      |
| Hypertension, %                            | 60.0                   | 58.9                      | 0.73      |
| Diabetes, %                                | 22.6                   | 21.5                      | 0.60      |
| Serum total cholesterol, mmol/L            | 5.3 (0.9)              | 5.2 (0.9)                 | 0.46      |
| Body mass index, kg/m <sup>2</sup>         | 23.1 (3.2)             | 23.0 (3.3)                | 0.70      |
| eGFR $<$ 60 mL/min/1.73 m <sup>2</sup> , % | 14.8                   | 14.0                      | 0.64      |
| History of stroke, %                       | 4.4                    | 5.5                       | 0.33      |
| Current smoking, %                         | 14.3                   | 14.7                      | 0.83      |
| Current drinking, %                        | 36.6                   | 35.7                      | 0.70      |
| Regular exercise ( $\geq$ 3 times/week), % | 12.4                   | 13.2                      | 0.62      |
| Serum albumin, g/dL                        | 4.3 (0.3)              | 4.3 (0.3)                 | 0.60      |
| Serum folate, ng/mL                        | 5.7 (2.7)              | 5.3 (5.0)                 | 0.06      |
| Serum vitamin B12, pg/mL*                  | 476 (343–643)          | 445 (332–621)             | 0.11      |
| Serum tHcy, $\mu$ mol/L*                   | 8.1 (6.5–10.2)         | 8.5 (6.9–10.9)            | $<$ 0.001 |

Abbreviations: MTHFR, methylenetetrahydrofolate reductase; eGFR, estimated glomerular filtration rate

Data are shown as mean (standard deviation) or frequency.

\*Values are median (interquartile range).

**Supplementary Table S5.** Hazard ratios and 95% confidence intervals of all-cause dementia and its subtypes according to MTHFR C677T genotype

| MTHFR C677T genotype       | Hazard ratio (95% confidence interval) |      |                         |      |
|----------------------------|----------------------------------------|------|-------------------------|------|
|                            | Age- and sex-adjusted                  | P    | Multivariable-adjusted* | P    |
| <b>All-cause dementia</b>  |                                        |      |                         |      |
| CC genotype                | 1.00 (reference)                       |      | 1.00 (reference)        |      |
| CT genotype                | 1.14 (0.91–1.42)                       | 0.26 | 1.13 (0.90–1.42)        | 0.28 |
| TT genotype                | 1.42 (1.04–1.94)                       | 0.03 | 1.50 (1.09–2.06)        | 0.01 |
| <b>Alzheimer's disease</b> |                                        |      |                         |      |
| CC genotype                | 1.00 (reference)                       |      | 1.00 (reference)        |      |
| CT genotype                | 1.23 (0.94–1.63)                       | 0.13 | 1.24 (0.94–1.64)        | 0.13 |
| TT genotype                | 1.32 (0.88–1.98)                       | 0.18 | 1.36 (0.91–2.05)        | 0.14 |
| <b>Vascular dementia</b>   |                                        |      |                         |      |
| CC genotype                | 1.00 (reference)                       |      | 1.00 (reference)        |      |
| CT genotype                | 1.13 (0.73–1.75)                       | 0.58 | 1.07 (0.68–1.66)        | 0.77 |
| TT genotype                | 1.28 (0.69–2.37)                       | 0.43 | 1.38 (0.74–2.57)        | 0.31 |

Abbreviation: MTHFR, methylenetetrahydrofolate reductase

\*Adjusted for age, sex, education, hypertension, diabetes, serum total cholesterol, body mass index, estimated glomerular filtration rate, history of stroke, current smoking, current drinking, regular exercise, serum albumin, serum folate, and serum vitamin B12 levels (log-transformed).

**Supplementary Table S6.** Crude and age- and sex-adjusted incidence rate of all-cause dementia according to education and serum total homocysteine levels\*

|                    | Crude incidence rate<br>/10 <sup>3</sup> person year |                      | Age- and sex-adjusted<br>incidence rate (95% CI)<br>/10 <sup>3</sup> person years |                      |
|--------------------|------------------------------------------------------|----------------------|-----------------------------------------------------------------------------------|----------------------|
|                    | tHcy <11.5<br>μmol/L                                 | tHcy ≥11.5<br>μmol/L | tHcy <11.5<br>μmol/L                                                              | tHcy ≥11.5<br>μmol/L |
| Education >9 years | 13.7                                                 | 47.4                 | 18.7 (14.3–23.1)                                                                  | 47.9 (28.0–67.8)     |
| Education ≤9 years | 31.5                                                 | 60.1                 | 33.4 (28.3–38.3)                                                                  | 52.6 (38.0–67.1)     |

Abbreviations: tHcy, total homocysteine; CI, confidence interval

\*Serum tHcy was categorized into two groups: quintiles 1 through 4 (<11.5 μmol/) and quintile 5 (≥11.5 μmol/L).
